# Supplementary material for: Novel molecular subgroups within the context of receptor tyrosine kinase and adhesion signalling in multiple myeloma
Source: PubMed Central journal article supplement (PMC7933144; doi:10.1038/s41408-021-00442-2), 2021-03-04
Supplement: 41408_2021_442_MOESM3_ESM.pdf [file 41408_2021_442_MOESM3_ESM.pdf]

**Table S1 A** Genelist with RTKs used for the Python script "Genemapping"

BDNF  
PDGFRA  
PDGFRB  
FGFR2  
FGFR3  
CSF1R  
FLT4  
FGR  
TOM1L1  
MUSK  
NTRK2  
IGF1R  
EPHB2  
EPHB1  
NTRK3  
NTF3  
FYN  
NTRK1  
ERBB3  
FGFR1  
EPHA8  
EGFR  
EPHA2  
DRL  
DNT  
EmRK2  
ALK  
TEK  
AXL  
EPHA5  
CAD96Ca  
KIT  
CD117  
MST1R  
DDR1  
TEK  
INSR  
FMS  
MET  
RET  
SRC  
DDR1  
FGFR2  
DDR2  
SKY  
EPHA1

EPHA3  
EPHA4  
EPHA5  
EPHA7  
EGFR2  
ErbB2  
ErbB4  
FGFR1K  
FGFR4  
KDR  
FLT3  
GHR  
EPHB3  
EPHB4  
JAK1  
KGFR  
LTK  
EMR2  
MET  
TNK2  
NGFR  
ROS1  
ROR2  
RTK  
CDK7  
TIE1  
RYK  
VDR

**Table S1 B** Genelist with adhesion molecules used for the Phyton script "Genemapping"

CDH4  
CDH6  
CDH7  
CDH8  
CDH10  
CDH11  
CDH12  
CDH13  
CDH17  
CDH20  
CDH1  
CDH15  
CDH2  
CDH3  
CDH5  
CDH9  
CDH18  
CDH22  
CDH23  
MUCDHL  
DSC1  
DSC2  
DSC3  
DSG1  
DSG2  
DSG3  
DSG4  
CELSR2  
CELSR3  
PCDH1  
PCDH8  
PCDH10  
PCDHA1  
PCDHA4  
PCDH15  
PCDHGC3  
PCDHGA2  
PCDHA2  
PCDHA9  
PCDHGA3  
PCDHGB3  
PCDHB6  
ALCAM  
AMICA  
ASAM  
BCAM

BOC  
PECAM1  
CDO  
CEACAM1  
CEACAM3  
CEACAM4  
CEACAM5  
CEACAM6  
CEACAM7  
CEACAM8  
L1CAM2  
CLP24  
CLP1  
DSCAM  
DSCAML1  
EPCAM  
ESAM  
HEPACAM  
HEPACAM2  
ICAM1  
ICAM2  
ICAM3  
ICAM4  
ICAM5  
IGSFA4  
IGSF4B  
IGSF4C  
IGSF4D  
IGSF2  
IGSF11  
IGSF3  
IGSF22  
IGSF8  
IGSF1  
ISLR2  
JAMA  
JAMB  
JAMC  
JAM4  
NEGR1  
NEPH1  
NEPH3  
NEPH2  
LAMP  
MADCAM1  
MCAM  
MDGA1  
MDGA2

MFGE8  
NCAM1  
NCAML1  
NCAM2  
NPHS1  
NFASC  
NINJ1  
NINJ2  
NRCAM  
OBCAM  
OCAM  
PEAR1  
SALM2  
SALM3  
SALM4  
SALM5  
SIRPA  
SIRPB  
TCAM1  
THBS1  
THBS4  
THSD1  
TROP2  
UBE2S  
VCAM1  
VSIG3  
CLDN1  
CLDN3  
CLDN4  
CLDN6  
CLDN8  
CLDN10  
CLDN11  
CLDN12  
CLDN17  
CLDN19  
CNTN1  
CNTN2  
CNTN3  
CNTN4  
CNTN5  
CNTN6  
CNTNAP2  
AGRN  
TGFB1  
LYPD3  
CHI3L1  
CHI3L2

ECFL  
CHIA  
CILP1  
COCH  
COL1  
COL1A1  
COL2  
COL4  
COL4A1  
COL3A1  
COL13A1  
COL23A1  
COL25A1  
COL22A1  
COL7A1  
COL17A1  
COL6A3  
COL10A1  
COL22A1  
COLEC10  
COLEC12  
COL6A2  
COL24A1  
COL9A2  
COL9A1  
COL8A1  
COL4A5  
COL4A1  
COL19A1  
COL14A1  
COL6A6  
COL5A1  
COL11A1  
COL4A4  
COL18A1  
COL16A1  
COL12A1  
COMP  
CRISP3  
CRTAC1  
CCN2  
CTHRC1  
CCN1  
DPT  
DMP1  
ECM1  
COL18A1  
SPON1

FMOD  
FN1  
FBLN1  
DANCE  
FLRT1  
FLRT2  
FLRT3  
IL32  
IL32A  
IL32B  
IL32G  
LAMA1  
LAMA3  
LAMA4  
LAMC1  
LAMB2  
LAMA1  
LAMA2  
LAMB2  
LAMB3  
LAMA5  
LAMC2  
LAMB1  
MFAP2  
MFAP5  
MATN2  
MATN3  
MATN4  
MIA  
SPON2  
NPNT  
NID1  
NID2  
CCN3  
OPTC  
PRELP  
FREM1  
RSPO2  
RELN  
SMOC1  
SMOC2  
SOD3  
SPARC  
SPARCL1  
EGFL7  
TNC  
TNR  
THBS1

THBS2  
THBS4  
TINAG  
TGM2  
TGM3  
TGM4  
TGM7  
TGM6  
VTN  
VWF  
WARP  
CCN4  
ITGA1  
ITGA1B1  
ITGA11B1  
ITGA2  
ITGA2B1  
ITGA2B  
ITGA3  
ITGA3B  
ITGA4  
ITGA4B1  
ITGA4B7  
ITGA5  
ITGA5B1  
ITGA6  
ITGA6B4  
ITGA7  
ITGA8  
ITGA9  
ITGA9B1  
ITGAE  
ITGAEB7  
ITGAL  
PARVA  
TGBB1  
TGB2  
TGFBR3  
TGFBR2  
CD47  
LAMP3  
CD151  
CYTH1  
DMP1  
EDIL3  
EGFL6  
IBSP  
ICAP1



ILK  
ITGB1BP2  
MEPE  
MFGE8  
ITGALB2  
ITGAM  
ITGAMB2  
ITGAV  
ITGAVB1  
ITGAVB3  
ITGAVB5  
ITGAVB6  
ITGAVB8  
ITGAX  
ITGAXB2  
ITGA10  
ITGA10B1  
ITGA11  
ITGB1  
ITGB2  
ITGB3  
ITGB4  
ITGB5  
ITGB6  
ITGB7  
ITGB8  
MIG2  
MEDD9  
NID1  
NID2  
NIF  
OPN  
PXN  
PINCH1  
RAGE  
APBB1IP  
TLN1  
TLN2  
TNXB  
TINAG  
TSPAN8  
TSPAN9  
TSPAN1  
TSPAN7  
ASGPR1  
/CD93  
FCER2  
CD72

KLRD1  
CLEC13A  
CHODL  
COLEC11  
COLEC12  
COLEC10  
CLEC1  
CLEC2  
CLEC3B  
CLEC4D  
CLEC4F  
CLEC9A  
CLEC2A  
CLEC10A  
CLEC14A  
CLEC4L  
DCSIGN  
DCSIGNR  
CLEC4B  
CLEC4A  
DEC205  
CLEC7A  
CLEC6A  
CLEC6A  
CLEC12B  
FCN1  
FCN2  
FCN3  
KLRE1  
CD207  
LAYN  
LOX1  
CLEC4G  
MBL  
MBL1  
MBL2  
CLEC5A  
MGL1  
MGL2  
CLEC12A  
MMR  
MRC2  
NKG2A  
NKG2C  
NKG2D  
NKG2H  
KLRF1  
CLEC2d

CLEC2I  
PLA2R1  
FREM1  
REG1  
REG1A  
REG1B  
REG2  
REG3A  
REG3B  
REG3D  
REG4  
CLEC11A  
SIGNR1  
SIGNR3  
SIGNR4  
SIGNR7  
SPD  
LGALS1  
LGALS2  
LGALS3  
MAC2BP  
LGALS4  
LGALS7  
LGALS8  
LGALS9  
LGALS10  
LGALS14  
CD83  
SIGLEC4A  
SIGLEC1  
SIGLEC2  
SIGLEC3  
SIGLEC5  
SIGLEC6  
SIGLEC7  
SIGLEC9  
SIGLEC10  
SIGLEC11  
SIGLEC14  
SIGLEC16  
SIGLECE  
SIGLECF  
SELE  
SELL  
SELP  
ITLN1  
LMAN1L  
PVRL1

PVRL2  
PVRL3  
PVRL4  
CD44  
HABP1  
HAPLN1  
HAPLN4  
HAS1  
HASL  
HYAL4  
HYAL3  
LAYN  
LYVE1  
NCAN  
SPAM1  
STAB1  
STAB2  
TSG6  
ACAN  
AGRN  
BGN  
BCAN  
DCN  
DSPG3  
DAG1  
ESM1  
PODLX2  
HSPG2  
FMOD  
GPC1  
GPC2  
GPC3  
GPC5  
GPC6  
LUM  
OGN  
ARSA  
ARSB  
ARSG  
ARSD  
ARSE  
GUSB  
CHST15  
EXTL1  
EXTL2  
EXTL3  
GNS  
NCAN

CSPG5  
NG2  
OPTC  
OSAD  
PODN  
PRELP  
SGCD  
SDC1  
SDC2  
SDC3  
SDC4  
SPOCK1  
SPOCK2  
SPOCK3  
VCAN  
HS2ST1  
HS3ST1  
HS3ST4  
HS6ST1  
HS6ST2  
HS6ST3  
IDS  
SULF2  
WARP  
AMIGO  
AMIGO2  
AMIGO3  
MUC16  
MUC21  
MUC4  
MUC20  
MUC6  
MUC17  
MUC13  
MUC12  
MUC2  
MUC5AC  
MUC7  
CD2  
CD6  
CD9  
CD34  
SRB3  
CD43  
CD44  
LFA3  
CD63  
SLAMF5

CD90  
CD96  
CD98  
CD99  
CD99L2  
CD164  
SLAMF3  
DOCK3  
DOCK1  
DOCK7  
GPR56  
GPR101  
GPR112  
GPRASP1  
GPR124  
GPR155  
GPR142  
GPR199  
GPR64  
GPR111  
GPR45  
GPR123  
GPR116  
GPR125  
GPR133  
GPR156  
GPR158  
GPRC6A  
GPR114  
GPR78  
GPRC5B  
GPR115  
GPR110  
GPR113  
HIC5  
MUC1  
NRXN1A  
NXRN1B  
NRXN2A  
NRXN3  
NRXN3B  
NRXN1  
ODZ1  
ODZ2  
ODZ3  
ODZ4  
VCL  
ADAM8

ADAM9  
ADAM10  
ADAM12  
ADAM19  
ADAMTS1  
ADAMTS3  
ADAMTS4  
ADAMTS5  
ADAMTS8  
ENPEP  
ERAP2  
ANPEP  
ONPEP  
XPNPEP1  
XPNPEP2  
ARTS1  
DPEP3  
DPEP1  
ANPEP  
FNPEP  
RNPEPL1  
CPA1  
CPA2  
CPA4  
CPB1  
MMP1  
MMP2  
MMP3  
MMP7  
MMP8  
MMP9  
MMP10  
MMP11  
ADAM22  
ADAM23  
ADAM32  
ADAM33  
ADAM17  
ADAMTS10  
ADAMTS13  
ADAMTS15  
ADAMTSL1  
METAP  
METAP1  
METAP1D  
METAP2  
CPB2  
CPE

CPXM1  
PRCP  
CPGL  
MMP12  
MMP13  
MMP14  
MMP15  
MMP16  
MMP19  
MMP24  
MMP25  
SPOCK1  
SPOCK2  
SPOCK3  
TIMP  
TIMP1  
TIMP2  
TIMP3  
TIMP4  
PLAUR



**Table S1 C** Genelist with effector molecules used for the Python script "Genemapping"

PLCG  
DAG  
IKK  
PKC  
cAMP  
AKAP  
PKA  
PKAC  
GRK2  
SOS  
GBR2  
SHC  
GAB1  
IRS  
JAK  
RAS  
RAF  
MEK  
ERK  
STAM  
PI3K  
PIP2  
PIP3  
PDK1  
AKT  
MTOR  
BAD  
TYK2  
STAT  
IRF9  
PTEN  
HK3  
GSK  
FOXO  
FYN  
SHC  
GRB2  
SOS  
FAK  
SRC  
RHOGAP  
ROCK  
MLC  
CDC42  
PAK

JNK  
CASP  
DAB1  
MAPK  
PI3K  
ERK  
ILK  
AKT  
FRAP  
PXN  
VCL  
VASP  
RAS  
RAF  
MEK  
MAPK  
ERK  
PTK2B

**Table S2:** Clinical characteristics of the study population

| Characteristic                                                          | Value (n = 43)   |
|-------------------------------------------------------------------------|------------------|
| <b>Age, median (range), yr</b>                                          | 66.2 (49.9-87.1) |
| <b>Male sex, n (%)</b>                                                  | 27 (63)          |
| <b>Type of myeloma, n (%)</b>                                           |                  |
| IgG                                                                     | 25 (58)          |
| IgA                                                                     | 13 (30)          |
| Light chain                                                             | 5 (12)           |
| <b>BM plasma cell infiltration, (%)</b>                                 |                  |
| <30%                                                                    | 7 (16)           |
| 30-59%                                                                  | 12 (28)          |
| ≥60                                                                     | 23 (54)          |
| Data not available                                                      | 1 (2)            |
| <b>Cytogenetic abnormality, n (%)</b>                                   |                  |
| <b>del17p</b>                                                           |                  |
| Yes                                                                     | 10 (23)          |
| No                                                                      | 27 (63)          |
| Data not available                                                      | 6 (14)           |
| <b>t(4;14)</b>                                                          |                  |
| Yes                                                                     | 10 (23)          |
| No                                                                      | 26 (61)          |
| Data not available                                                      | 7 (16)           |
| <b>t(14;16)</b>                                                         |                  |
| Yes                                                                     | 2 (5)            |
| No                                                                      | 31 (72)          |
| Data not available                                                      | 10 (23)          |
| <b>amp1q21</b>                                                          |                  |
| Yes                                                                     | 14 (33)          |
| No                                                                      | 20 (46)          |
| Data not available                                                      | 9 (21)           |
| <b>hyperdiploid</b>                                                     |                  |
| Yes                                                                     | 7 (16)           |
| No                                                                      | 24 (56)          |
| Data not available                                                      | 12 (28)          |
| <b>High-risk disease at study entry, n (%)</b>                          |                  |
| Yes                                                                     | 15 (35)          |
| Data not available                                                      | 7 (16)           |
| <b>Treatment-naïve patients, n (%)</b>                                  | 11 (26)          |
| <b>Median No. of prior treatment regimens in pretreated pts (range)</b> | 1 (1-8)          |
| <b>Median time since initial diagnosis, yr (range)</b>                  | 1.7 (0-9.2)      |
| <b>Eligible for autologous stem cell transplantation, n (%)</b>         | 33 (77)          |
| <b>Novel agents for induction, n (%)</b>                                | 34 (79)          |

**Table S7** Comparisons and their corresponding *p*-values

| <b>Correlation/Comparison</b>                           | <b>Figure</b> | <b>Fisher's Exact<br/>(patient-level)</b> | <b>Fisher's Exact<br/>(biopsy-level)</b> | <b>MWU<br/>(biopsy-level)</b> | <b>log-rank</b> |
|---------------------------------------------------------|---------------|-------------------------------------------|------------------------------------------|-------------------------------|-----------------|
| MSG1 vs MSG2 (MYC-expr.)                                | Fig. 1C,D     | <i>p</i> <0.05                            | <i>p</i> <0.01                           | <i>p</i> <0.01                | -               |
| MYC <sup>high</sup> vs MYC <sup>low</sup> (OS)          | Fig. 1E       | -                                         | -                                        | -                             | <i>p</i> =0.028 |
| High vs interm./low-risk<br>(RKT mut-status)            | -             | <i>p</i> =0.245                           | <i>p</i> =0.324                          | -                             | -               |
| RTK <sup>mut</sup> vs RTK <sup>WT</sup> (OS)            | -             | -                                         | -                                        | -                             | <i>p</i> =0.448 |
| High vs interm./low-risk<br>(MYC expr-status)           | -             | <i>p</i> =0.041                           | <i>p</i> =0.0767                         | -                             | -               |
| RTK <sup>mut</sup> vs RTK <sup>WT</sup> (MYC expr.)     | -             | <i>p</i> =0.147                           | <i>p</i> =0.183                          | -                             | -               |
| High vs interm./low-risk<br>(MYC expr.-/RKT mut-status) | Fig. 1G       | <i>p</i> <0.01                            | <i>p</i> =0.04                           | -                             | -               |
| MYC <sup>high</sup> vs MYC <sup>low</sup> (OS)          | Fig. 1H       | -                                         | -                                        | -                             | <i>p</i> =0.021 |
| MSG1 vs MSG2 (TMB)                                      | -             | -                                         | -                                        | <i>p</i> =0.012               | -               |
| TP53-dh vs TP53-sh (OS)                                 | -             | -                                         | -                                        | -                             | <i>p</i> =0.105 |
